# Supplementary material for: Modifiable Determinants of Postpartum Weight Loss in Women with Obesity: A Secondary Analysis of the UPBEAT Trial
Source: MDPI journal article supplement (doi:10.3390/nu13061979), 2021-06-09
Supplement: s1 [file s1]

**Supplementary Table S1: Additional Maternal and infant demographics**

| <b>Maternal demographics</b>                                                         | <b>N</b> | <b>Mean (SD)/ Median (IQR)/ N%</b> |
|--------------------------------------------------------------------------------------|----------|------------------------------------|
| <b>15-18 weeks' gestation (baseline)</b>                                             |          |                                    |
| WHO BMI categorises                                                                  |          |                                    |
| Obese I (30.0-34.9 kg/m <sup>2</sup> )                                               |          | 331 (50)                           |
| Obese II (35.0 -39.9 kg/m <sup>2</sup> )                                             |          | 207 (31)                           |
| Obese III (≥40.0 kg/m <sup>2</sup> )                                                 |          | 129 (19)                           |
| Intervention                                                                         | 667      | 330 (49)                           |
| Glycaemic index                                                                      | 578      | 56.5 (4.2)                         |
| Energy intake (Kcal)                                                                 | 578      | 1716 (766)                         |
| Physical activity (METs/week) <sup>†</sup>                                           |          |                                    |
| Low                                                                                  | 578      | 139 (24)                           |
| Moderate                                                                             |          | 300 (52)                           |
| High                                                                                 |          | 139 (24)                           |
| <b>Infant demographics</b>                                                           |          |                                    |
| Large for gestational age >90 <sup>th</sup> centile for gestational age <sup>*</sup> | 667      | 86 (13)                            |
| <b>Maternal antenatal and postpartum characteristics</b>                             |          |                                    |
| Gestational diabetes mellitus <sup>**</sup>                                          | 656      | 181 (27)                           |
| Exclusively breastfeeding ≥ four months                                              | 621      | 187 (30)                           |

Abbreviations: BMI: body mass index; METs: Metabolic equivalent task; SES: Socio-economic Status; WHO: World Health Organisation <sup>\*</sup> Customised birthweight centile calculated adjusting for maternal height and weight, ethnic origin, parity and sex of the infant. <sup>†</sup> MET is defined as the energy expenditure ratio of activity to rest; 1 MET is approximately equal to an individual's resting energy expenditure

**Supplementary Table S2: unadjusted associations between predictors associated with postpartum weight retention (model A)**

| Predictor                                        |                    | B-coefficient 95% CI       | p-value |
|--------------------------------------------------|--------------------|----------------------------|---------|
| Maternal characteristics                         |                    |                            |         |
| Ethnicity                                        | White              | Ref                        | 0.056   |
|                                                  | Black              | 1.36 (0.03 to 2.70)        |         |
|                                                  | Asian              | 0.11 (-2.72 to 2.94)       |         |
|                                                  | Other              | 2.32 (0.16 to 4.48)        |         |
| Smoking at all in pregnancy                      |                    | 1.97 (0.48 to 3.45)        | 0.01    |
| IMD <sup>‡</sup>                                 | 1 (Least deprived) | -2.65 (-5.21 to -0.10)     | 0.28    |
|                                                  | 2                  | -0.82 (-2.92 to 1.28)      |         |
|                                                  | 3                  | -0.88 (-2.63 to 0.86)      |         |
|                                                  | 4                  | -0.17 (-1.35 to 1.00)      |         |
|                                                  | 5 (Most deprived)  | Ref                        |         |
| 15-18 weeks' gestation                           |                    |                            |         |
| Glycaemic Index                                  |                    | -0.07 (-0.21 to 0.06)      | 0.26    |
| Energy intake (kcal)                             |                    | -0.0002(-0.0009 to 0.0005) | 0.63    |
| Intervention                                     |                    | -0.76 (-1.84 to 0.32)      | 0.17    |
| Infant demographics                              |                    |                            |         |
| Mode of delivery                                 | Unassisted vaginal | Ref                        | 0.07    |
|                                                  | LSCS in labour     | 0.28 (-1.11 to 1.67)       |         |
|                                                  | Operative vaginal  | 0.84 (-0.75 to 2.43)       |         |
|                                                  | Pre-labour LSCS    | -1.35 (-2.71 to 0.0004)    |         |
| Breast feeding ≥ 4months                         |                    | -2.14 (-3.33 to -0.96)     | <0.001  |
| Maternal antenatal and postnatal characteristics |                    |                            |         |
| NAM GWG <sup>‡</sup>                             | Inadequate         | -2.23 (-3.49 to -0.98)     | <0.001  |
|                                                  | Adequate           | Ref                        |         |
|                                                  | Excessive          | 3.53 (2.33 to 4.72)        |         |
| Smoking postpartum                               |                    | 1.74 (-0.28 to 3.77)       | 0.09    |
| Postpartum physical activity (METs/week)         | Low                | Ref                        | 0.04    |
|                                                  | Moderate           | -1.90 (-3.51 to -0.28)     |         |
|                                                  | Viaorous           | -1.91 (-3.58 to -0.24)     |         |

Abbreviations: NAM: National Academy of Medicine Guidelines; GWG: gestational weight gain; METs: Metabolic equivalent task; SES: Socio-economic Status; <sup>‡</sup>IMD quintiles are calculated for the region of residence, by fifths of the population. UK wide-scores were developed by reconciling Scottish data to English norms. <sup>‡</sup>Gestational weight gain calculated using estimated weight before pregnancy according to the NAM Weight Management in Pregnancy Guidelines. <sup>†</sup>MET is defined as the energy expenditure ratio of activity to rest; 1 MET is approximately equal to an individual's resting energy expenditure
